# Supplementary material
Source: MDPI journal article supplement (https://www.mdpi.com/2673-4591/37/1/120)
Supplement: s1 [file s1]

## Introduction

Gases evaporate from manure, mass exchange takes place between the liquid on the manure surface and the surrounding air flow. This evaporation process corresponds to the general structure of all evaporation processes, and the basis of its structure is convective mass exchange, where the gas flow varies depending on the convective mass transfer coefficient and the gas concentration gradient on the surface of the manure layer and on the surface of the manure (Rong et al., 2009). When choosing methods for the study of GHG emissions, it is necessary to evaluate the technology and technical solutions of keeping animals in the barn. When modernizing animal husbandry technologies, it is very important to reduce the impact on environmental pollution. Gas emissions must be reduced at all stages of manure management: barns, manure pits and during transport and incorporation of manure into the soil (Rzeznik et al., 2015; Zhang et al., 2005; Wu et al., 2012). In order to account for the modelling of greenhouse gas (GHG) emissions at the farm level, it is necessary to define the main farm components from a farm-wide perspective (Schils et al., 2007).

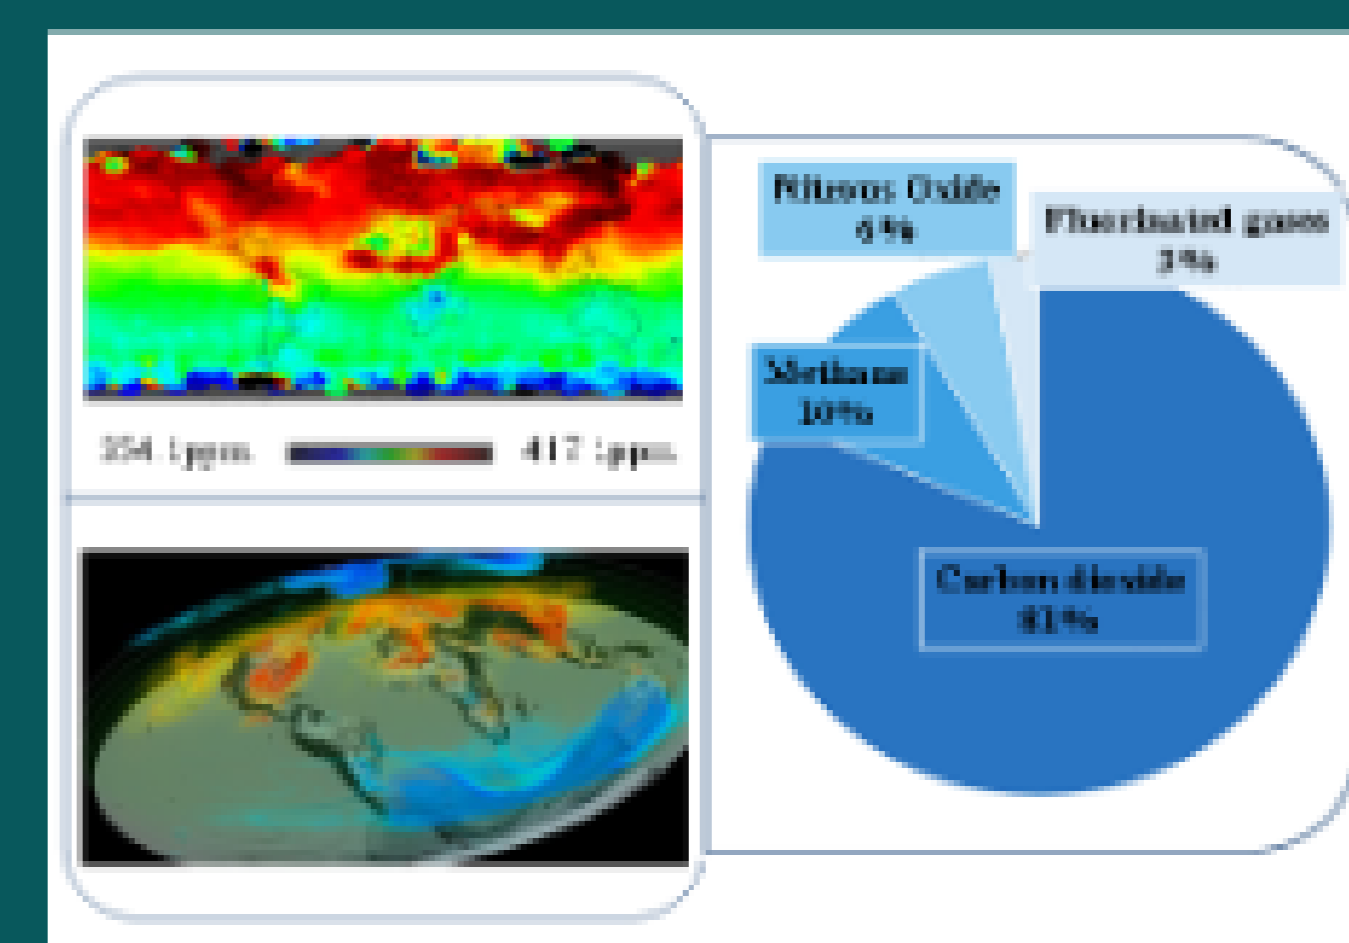

## Method

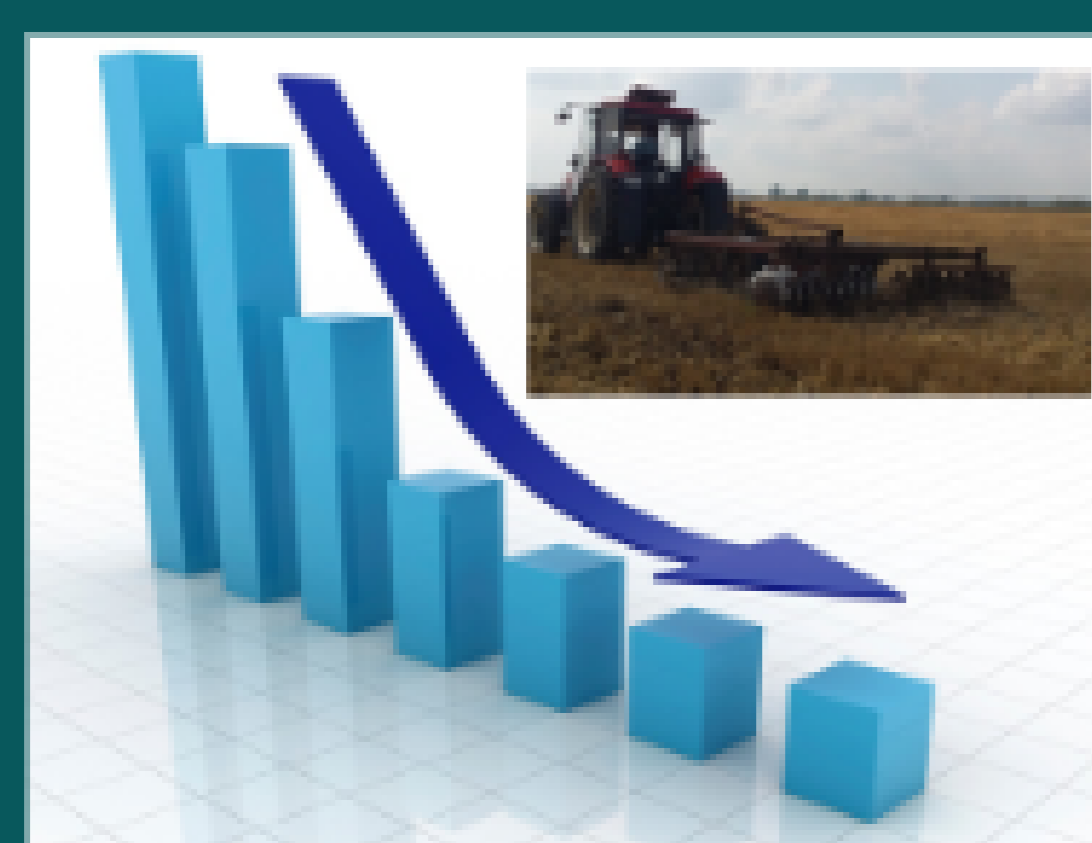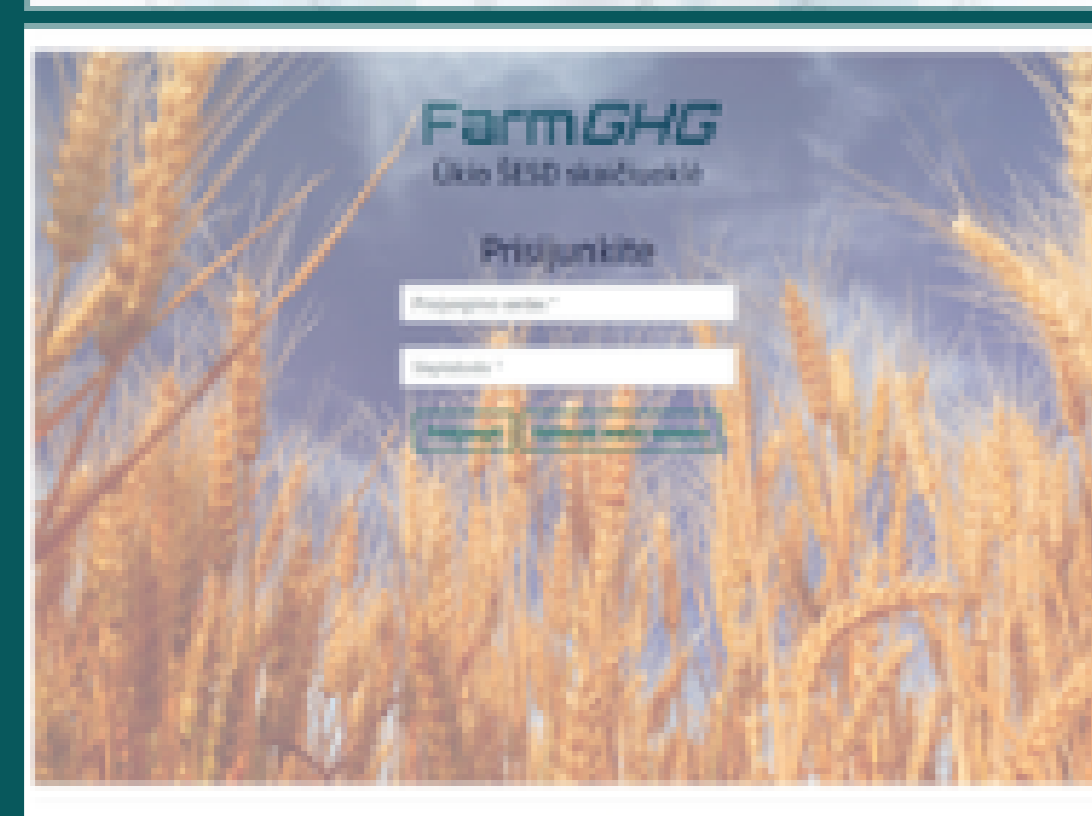

The accounting system for GHG emissions and CO<sub>2</sub> absorptions at the farm level is an IT tool created according to specially prepared GHG calculation methodologies, adapted formulas with selected variables and parameters. The main aspects of the activities of the mixed, animal husbandry and crop farms that influence GHG were evaluated.

It is mandatory to use the GHG accounting methodology of the Intergovernmental Panel on Climate Change (IPCC - Intergovernmental Panel on Climate Change). According to the IPCC methodology, based on the experience of other countries, a spectrum of GHG emission sources has been determined at the farm level, including criteria defining the sustainability of the farm, and a methodology and system for accounting for GHG emissions at the farm level has been created. The developed model-system for calculating GHG emissions is calculated in three stages. The animal population is divided into subgroups and each of them is described. The emission coefficients of each subgroup in kilograms per animal per year and the number of animals in the subgroup are evaluated. Three (Tier 1, Tier 2, Tier 3) detail and complexity methods were used for calculation. The accounting system for GHG emissions at the farm level is created according to specially prepared GHG calculation methodologies, adapted formulas with selected variables and parameters. It was calculated main parameters - enteric fermentation, CH<sub>4</sub>, direct and indirect N<sub>2</sub>O emissions, recalculated CO<sub>2</sub> eq and total emissions from manure management. The calculation platform was tested by 3 scenarios. SC1 - pasture 25%, solid manure management system 75%, SC2 - pasture 0%, solid manure management system 100%, SC3 - aerobic recycling 100%.

## Results

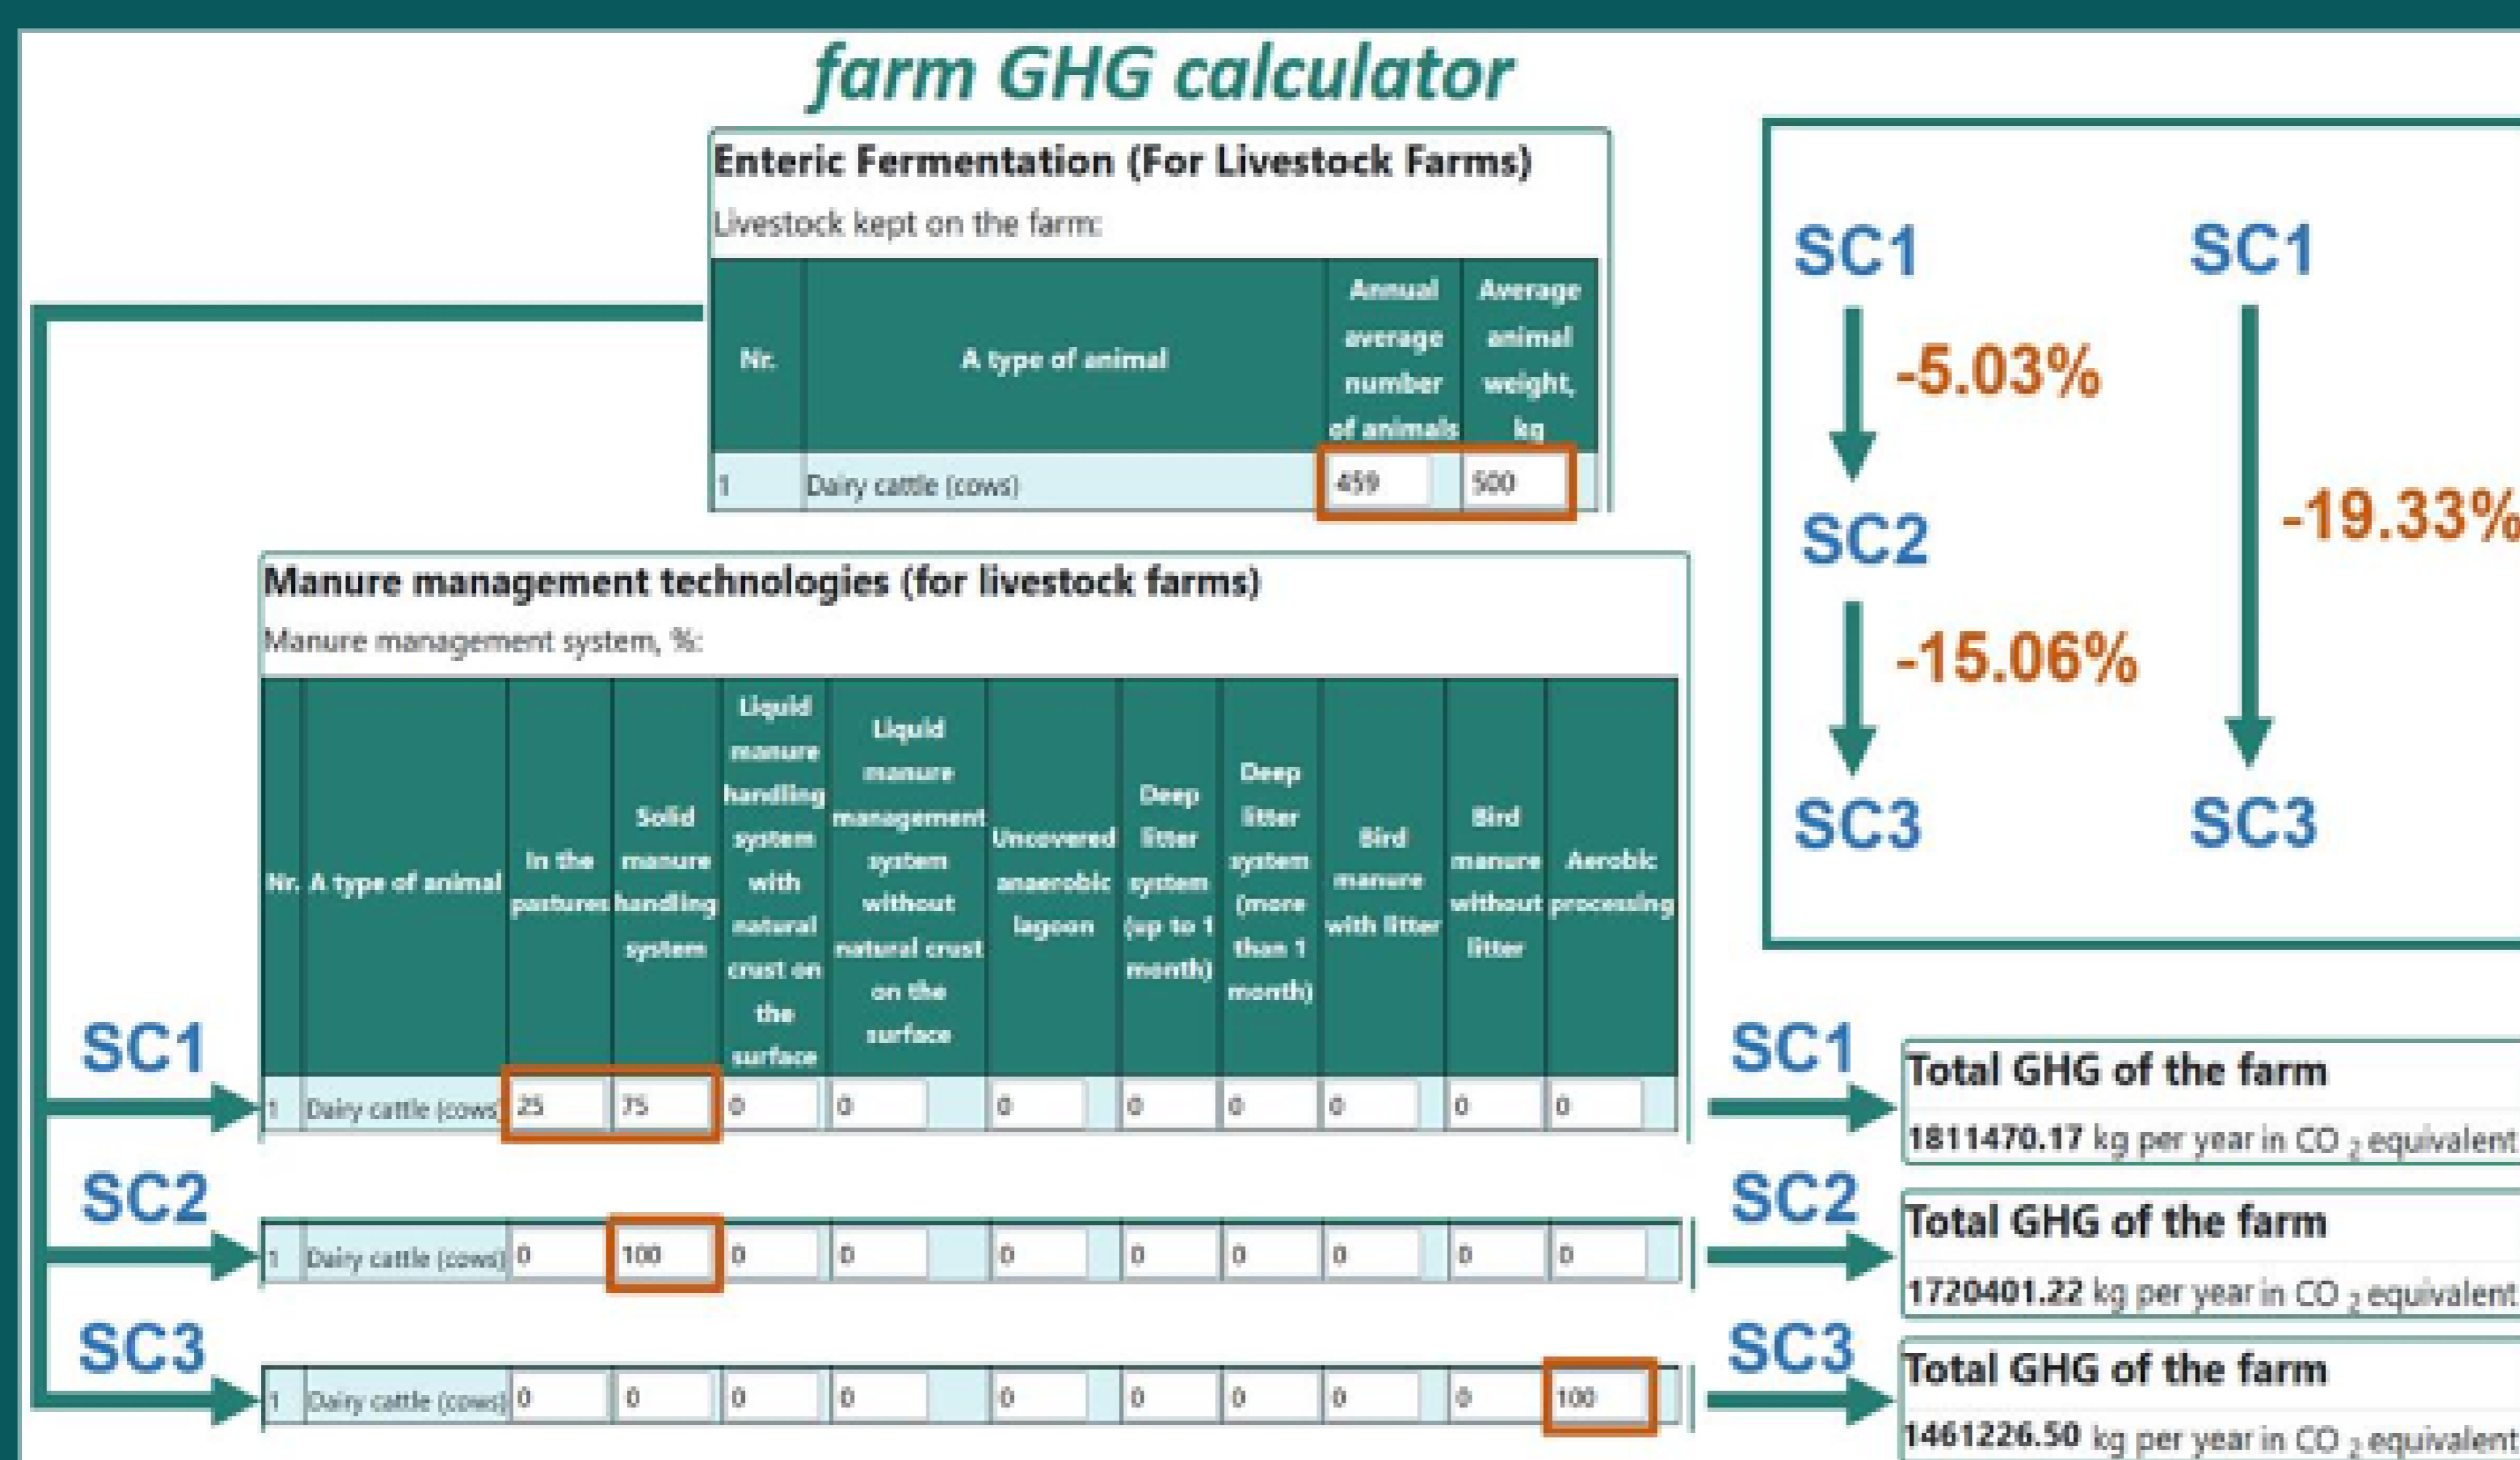

After calculation platform assessment of different scenarios when is simulating different manure management such effective measurements for GHG reduction. It was evaluated that SC1 scenario (pasture 25%, solid manure management system 75%) when average number of animals 459 and animal weight 500 kg, was effective and 5% reduce CO<sub>2</sub> eq per year. SC2 scenario (pasture 0%, solid manure management system 100%) was more effective and 15% reduce CO<sub>2</sub> eq per year. The most effective was scenario SC3 (aerobic recycling 100%) and more then 19% reduce CO<sub>2</sub> eq per year.

## Conclusions

- After analyzing all the factors that shape emissions at the farm level and correctly reflect sustainable farm actions that ensure the principles of circularity and sustainable resource use, the FarmGHG calculation tool will help determine the emission sources of technologies and tools applied on the farm according to the IPCC methodology.
- A methodically based GHG accounting system, which will record more accurate data collection in specific farms, would enable the state to know problem areas to which support measures aimed at reducing GHG emissions could be directed more appropriately, to carry out monitoring and to analyze the benefits provided by the support.
- The FarmGHG assessment system is an effective tool for consultants providing consulting services, preparing farm sustainability plans and monitoring the results of the implementation of measures. Also, more detailed farm-level data will allow the farmer to make individual decisions related to reducing greenhouse gas emissions, optimizing the farm, and increasing productivity.

## References

- Rong, L.; Nielsen, P.V.; Zhang, G., 2009. Effects of airflow and liquid temperature on ammonia mass transfer above an emission surface: Experimental study on emission rate. *Bioresource Technology* 100(20), p. 4854–4861.
- Rzeznik, W.; Mielcarek, P., 2016. Greenhouse Gases and Ammonia Emission Factors from Livestock Buildings for Pigs and Dairy Cows. *Pol. J. Environ. Stud.* Vol. 25, No. 5, p. 1-9.
- Wu, W.; Zhang, G.; Kai, P., 2012. Ammonia and methane emissions from two naturally ventilated dairy cattle buildings and the influence of climatic factors on ammonia emissions. *Atmos. Environ.* 61, p. 232–243.
- Zhang, G.; Strom, J.S.; Li, B.; Rom, H.B.; Morsing, S.; Dahl, P.; Wang, C., 2005. Emission of ammonia and other contaminant gases from naturally ventilated dairy cattle buildings. *Biosyst. Eng.* 92 (3), p. 355–364.
- Schils, R. L., Olesen, J. E., del Prado, A., & Soussana, J. F. (2007). A review of farm level modelling approaches for mitigating greenhouse gas emissions from ruminant livestock systems. *Livestock Science*, 112(3), 240–251.
